# Supplementary material
Source: PubMed Central journal article supplement (PMC5108883)
Supplement: MCB.00181-16_zmb999101359so1.pdf [file MCB.00181-16_zmb999101359so1.pdf]

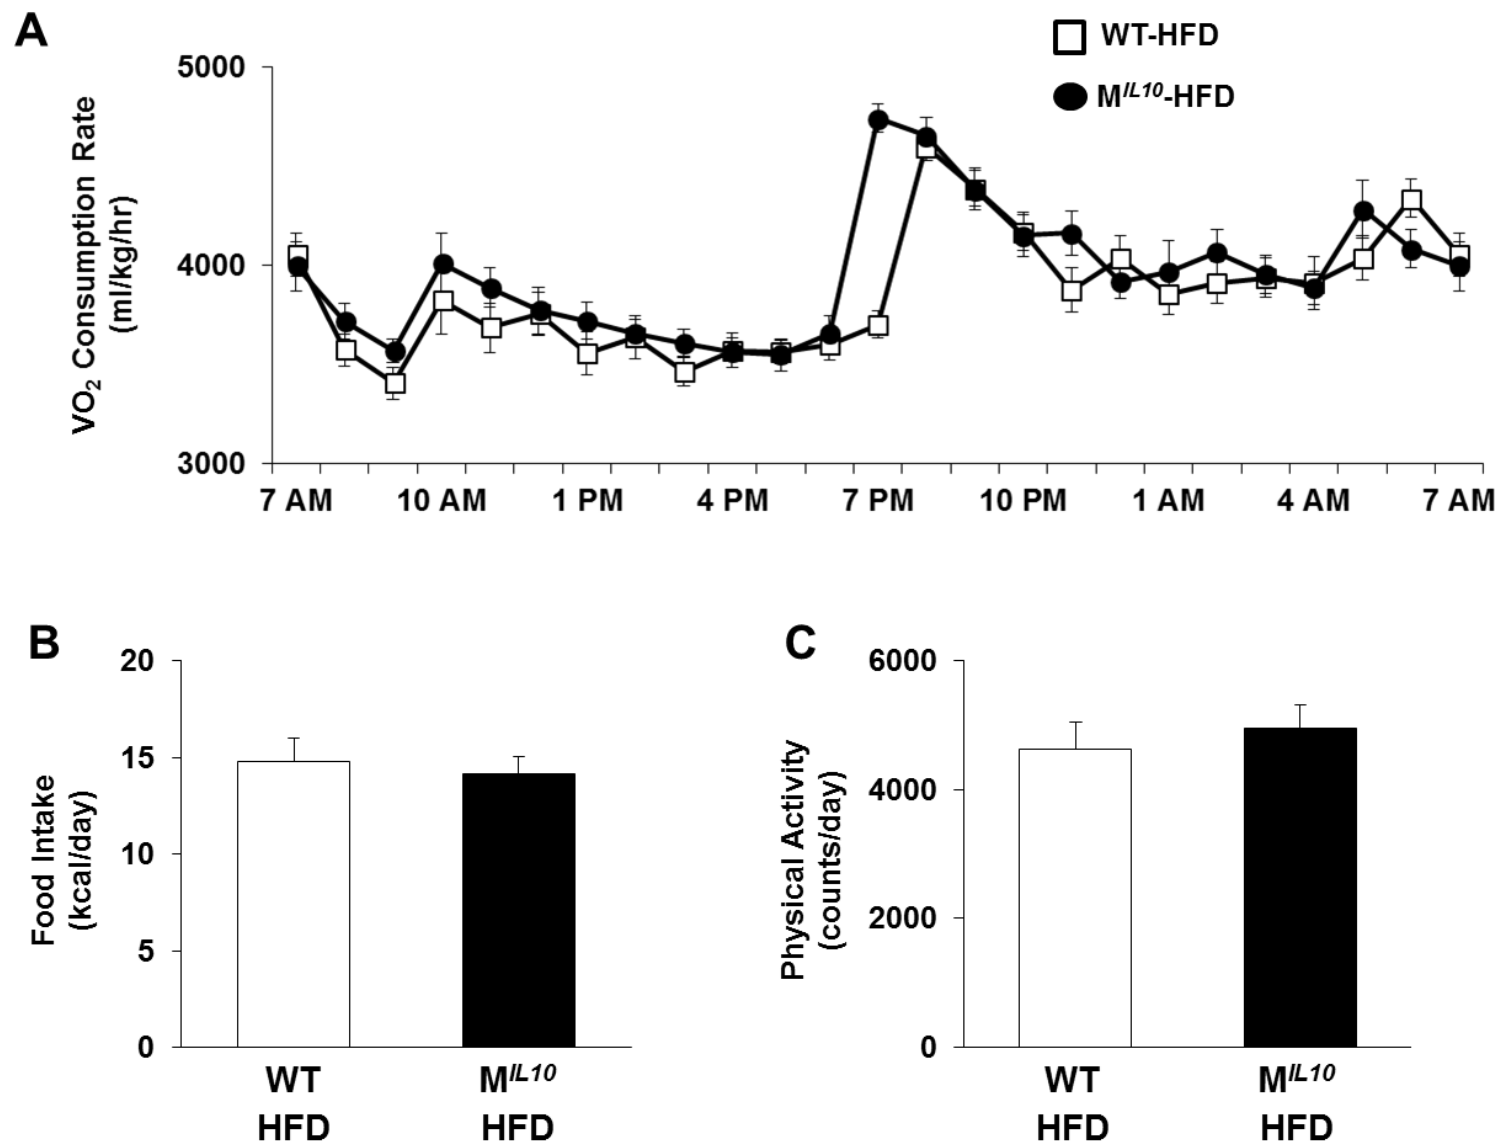

**Supp. Fig 1.** A 72-hour metabolic cage measurement in  $M^{IL10}$  and WT mice on long term HFD feeding. **A:** Oxygen consumption rates **B:** Daily food intake and **C:** Daily physical activity of  $M^{IL10}$  and WT mice on 16 weeks of HFD. Values are means  $\pm$  SE for 6 mice in each group.

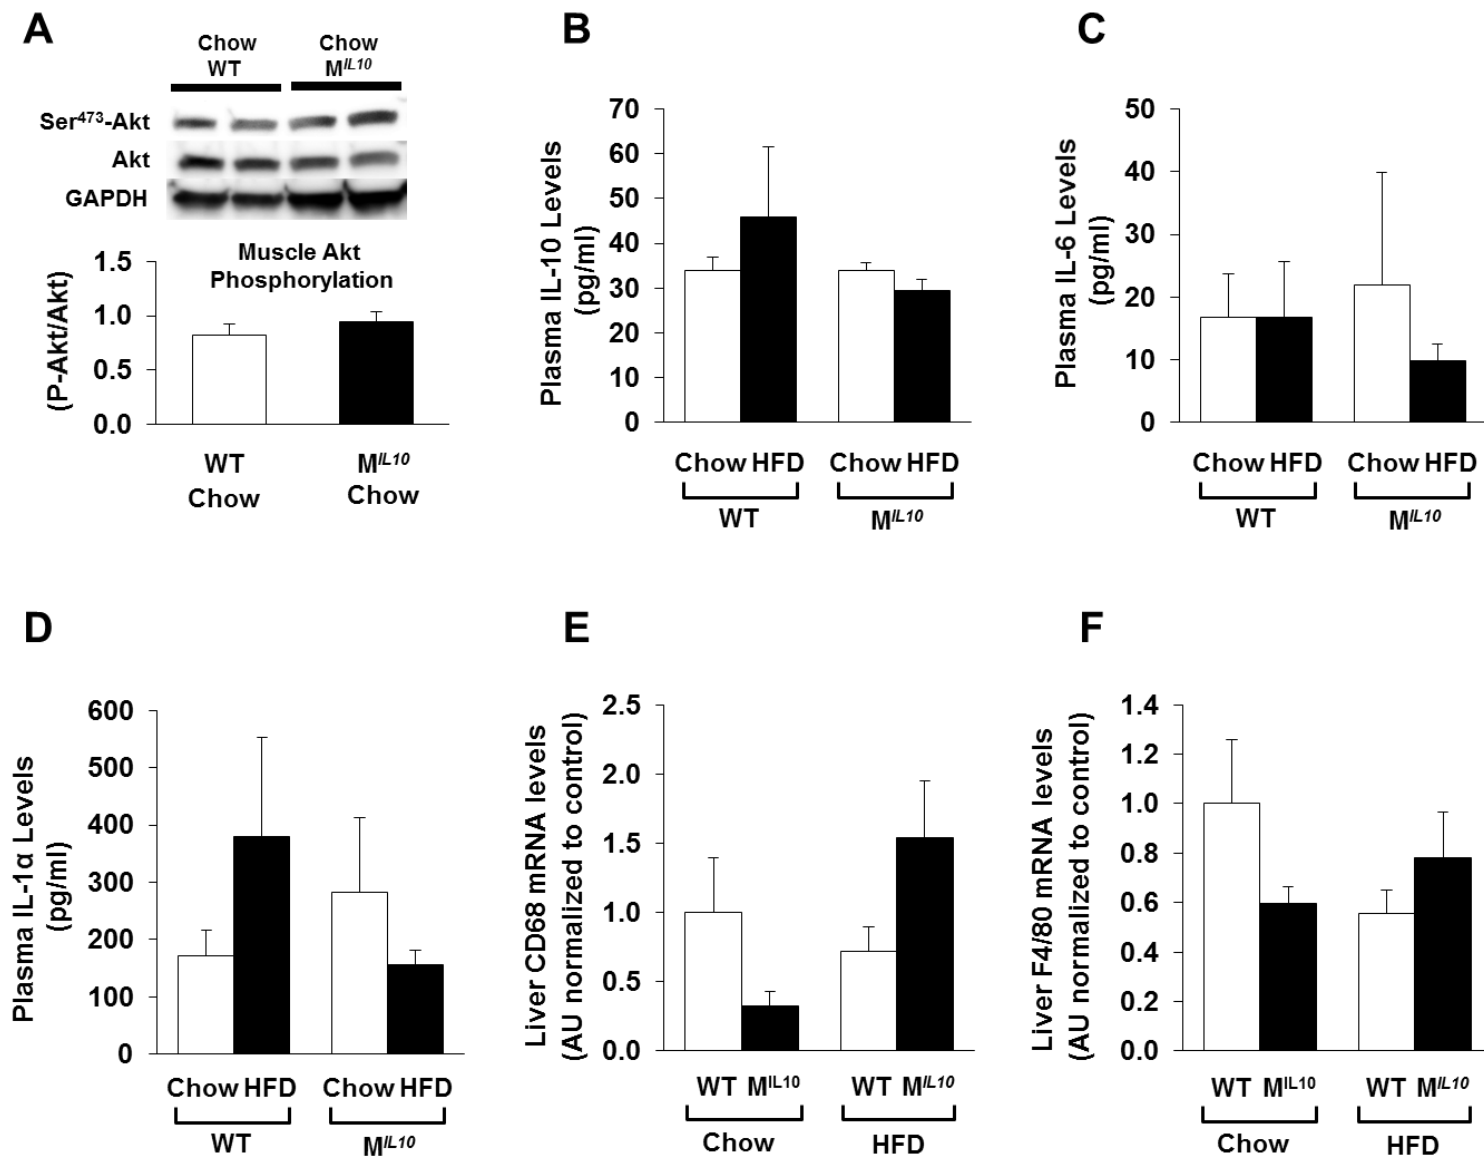

**Supp. Fig. 2. A:** Insulin-stimulated Akt phosphorylation of chow-fed WT and  $M^{L10}$  mice quadriceps muscles. **B, C, D:** Plasma IL-10, IL-6 and IL-1 $\alpha$  levels of same WT and  $M^{L10}$  mice measured after 16 weeks of HFD (n=5-6/group). **E, F:** Liver CD68 and F4/80 macrophage marker mRNA levels in chow and HFD-fed WT and  $M^{L10}$  mice (n=5-6/group).

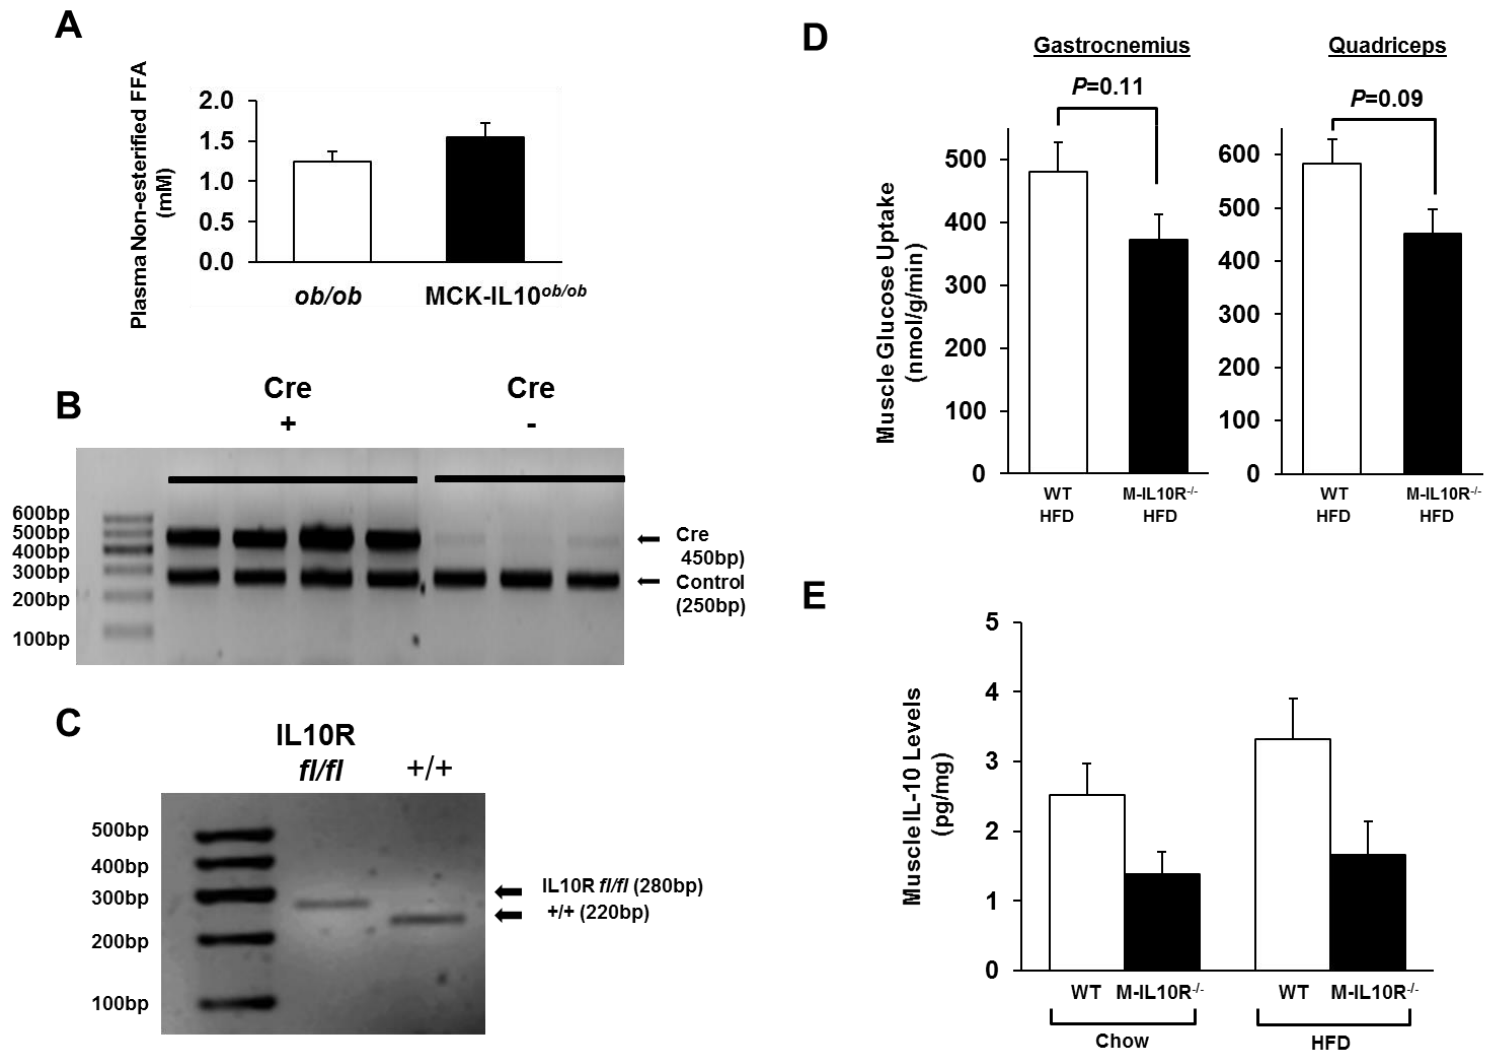

**Supp. Fig 3. A:** Plasma non-esterified free fatty acid levels of *ob/ob* and MCK-IL10<sup>*ob/ob*</sup> mice (n=6/group). Genotyping of M-IL10R<sup>-/-</sup> mice. **B:** PCR for Cre gene (450bp) **C:** IL10R LoxP PCR (WT band 220 bp floxed band 280 bp). **D:** Insulin-stimulated gastrocnemius and quadriceps glucose uptake levels in chow and HFD-fed WT and M-IL10R<sup>-/-</sup> mice (n=5-8/group) and **E:** Skeletal muscle IL-10 levels in chow and HFD-fed WT and M-IL10R<sup>-/-</sup> mice (n=4-6/group).

| <b>Primer name</b>     | <b>Primer sequence (5'-3')</b> |
|------------------------|--------------------------------|
| CD68-Forward           | TGTCTGATCTTGCTAGGACCG          |
| CD68-Reverse           | GAGAGTAACGGCCTTTTTGTG          |
| F4/80 (Emr1)-Forward   | TGACTCACCTTGTTGGTCCTAA         |
| F4/80 (Emr1)-Reverse   | CTCCCAGAATCCAGTCTTTCC          |
| G6Pase-Forward         | CRACTCGCTATCTCCAAGTGA          |
| G6Pase-Reverse         | GTTGAACCAGTCTCCGACCA           |
| IL-10-Forward          | TGAATCCCTGGGTGAGAAG            |
| IL-10-Reverse          | GCTCCACTGCCTTGCTCTTA           |
| IL-1 $\beta$ -Forward  | GAAATGCCACCTTTTGACAGTG         |
| IL-1 $\beta$ -Reverse  | CTGGATGCTCTCATCAGGACA          |
| IL-6-Forward           | AGTTGCCTTCTTGGGACTGA           |
| IL-6-Reverse           | TCCACGATTGCCAGAGAAC            |
| MCP-1-Forward          | TTAAAAACCTGGATCGGAACCAA        |
| MCP-1-Reverse          | GCATTAGCTTCAGATTACGGGT         |
| PEPCK-Forward          | CTGCATAACGGTCTGGACTTC          |
| PEPCK-Reverse          | CAGCAACTGCCCGTACTCC            |
| TNF- $\alpha$ -Forward | CAGGCGGTGCCTATGTCTC            |
| TNF- $\alpha$ -Reverse | CGATCACCCCGAAGTTCAGTAG         |

**Supp. Table 1.** List of primers
